# Supplementary material for: Single particle level dynamics of photoactivation and suppression of Auger recombination in aqueous Cu-doped CdS quantum dots
Source: Royal Society of Chemistry journal article supplement (doi:10.1039/d2nr06688b), 2023-01-01
Supplement: d2nr06688b1.pdf [file d2nr06688b1.pdf]

Electronic Supporting Information for

Single Particle Level Insights into Photoactivation  
and Suppression of Auger Recombination in  
Aqueous Cu-Doped CdS Quantum Dots

*Sharmistha Das, Gourab Rana, Fariyad Ali, Anindya Datta\**

Department of Chemistry  
Indian Institute of Technology Bombay  
Mumbai 400076, India

---

e-mail: [anindya@chem.iitb.ac.in](mailto:anindya@chem.iitb.ac.in) (AD) Phone: +91 22 2576 7149, Fax: +91 22 2576 7152

## Table of Contents

| Sr. No. | Content    | Description                                                          | Page |
|---------|------------|----------------------------------------------------------------------|------|
| 1.      | Note SN1   | Calculation of dopant concentration in Cu:CdS quantum dots           | S3   |
| 2.      | Table ST1  | Cu:Cd and Cd:S ratios as determined from ICP-AES                     | S3   |
| 3.      | Figure S1  | XPS Spectra                                                          | S4   |
| 4.      | Figure S2  | Second Derivative of Absorption Spectrum                             | S4   |
| 5.      | Table ST2  | QD size calculation                                                  | S5   |
| 6.      | Figure S3  | QD size variation with reaction time                                 | S6   |
| 7.      | Figure S4  | Variation of UV-Vis absorption with reaction time                    | S7   |
| 8.      | Figure S5  | Excitation wavelength dependent PL Spectra                           | S7   |
| 9.      | Table ST3  | Calculated Photoluminescence Quantum Yield                           | S7   |
| 10.     | Figure S6  | Effect of doping level on PL spectra and color                       | S8   |
| 11.     | Figure S7  | MLC <sub>CBT</sub> band in UV-Vis absorbance                         | S8   |
| 12.     | Figure S8  | Variation of PLQY with increasing reaction time                      | S9   |
| 13.     | Table ST4  | Temporal parameters for PL of undoped and Cu:CdS QDs                 | S10  |
| 14.     | Figure S9  | Wavelength dependent nanosecond PL transients                        | S10  |
| 15.     | Table ST5  | FCS parameters for undoped and Cu:CdS QDs.                           | S11  |
| 16.     | Figure S10 | Power dependence of FCS curves                                       | S11  |
| 17.     | Table ST6  | Variation of FCS fitting parameters with increasing excitation power | S12  |
| 18.     | Figure S11 | FCS control experiment with dye C102                                 | S13  |
| 19.     | Figure S12 | Variation of PL intensity and Diffusion time with excitation power   | S13  |

**Note SN1: Calculation of dopant concentration in Cu:CdS quantum dots.**

The mole fractions of Cd, Cu and S in the system was determined by Inductively coupled plasma atomic emission spectra (ICP-AES) is performed on an ARCOS simultaneous ICP spectrometer (SPECTRO Analytical Instruments GmbH, Germany) equipped with a CCD detector of wavelength range 130–770 nm and a resolution of 9 pm. A sample aliquot was first digested with aqua-regia and then analysed. The results are as follows:

**Table ST1:** Cu:Cd and Cd:S ratios as determined from ICP-AES measurements.

| S. No. | Precursor Ratio added for synthesis (Cu:Cd:S) | Cu:Cd (%Cu)     | Cd:S | Number of Cu atoms per QD |
|--------|-----------------------------------------------|-----------------|------|---------------------------|
| 1      | 0:1:1.8                                       | 0               | 1.70 | 0                         |
| 2      | 0.005:1:1.8                                   | 0.00197 (0.2%)  | 1.66 | 0.74                      |
| 3      | 0.01:1:1.8                                    | 0.00297 (0.3%)  | 1.65 | 1.12                      |
| 4      | 0.02:1:1.8                                    | 0.00675 (0.67%) | 1.65 | 2.55                      |

**Calculation of number of Cu-atoms per CdS quantum dots from ICP-AES results.**

Diameter of Cu:CdS QDs = 3.3 nm;

Density of CdS ( $d$ ) = 4.82 g cm<sup>-3</sup>; Molar Mass ( $M_{CdS}$ ) = 144.46 g mol<sup>-1</sup>

Radius of QDs ( $R$ ) = 1.65 nm = 1.65×10<sup>-7</sup> cm

Volume of QDs ( $V$ ) =  $\frac{4}{3}\pi R^3 = 1.881 \times 10^{-20}$  cm<sup>3</sup>

Mass of CdS ( $M$ ) =  $d \times V = 4.82 \text{ g cm}^{-3} \times 1.881 \times 10^{-20} \text{ cm}^3 = 9.065 \times 10^{-20}$  g

Moles of CdS ( $m$ ) =  $\frac{M}{M_{CdS}} = \frac{9.065 \times 10^{-20} \text{ g}}{144.46 \text{ g mol}^{-1}} = 0.063 \times 10^{-20}$  moles

No of moles of Cd = No of moles of CdS

No of Cd atoms =  $m \times N_A = 0.063 \times 10^{-20} \text{ mol} \times 6.023 \times 10^{23} \text{ mol}^{-1}$   
 = 377.95 Cd atoms per QD

Cu:Cd Ratio = 0.00197

No of Cu atoms per QD = 0.00197 × 377.95 = 0.744 atoms per QD

Similarly the calculation was done for other samples as well and the results are summarized in Table ST1.

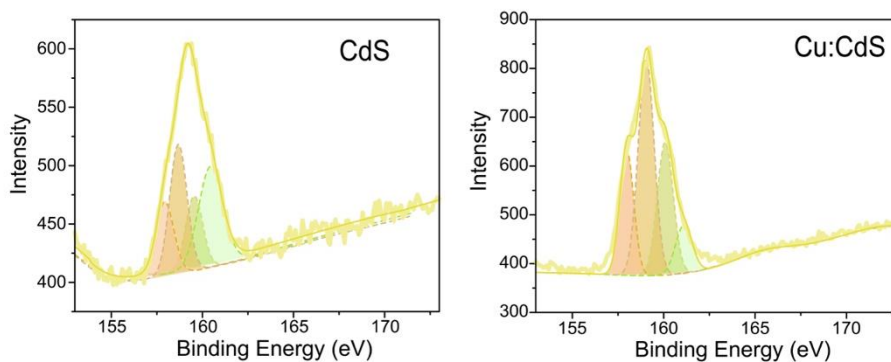

**Figure S1. XPS Spectra.** High resolution XPS spectra of S 2p region for (A) CdS QDs and (B) Cu:CdS QDs (0.3%).

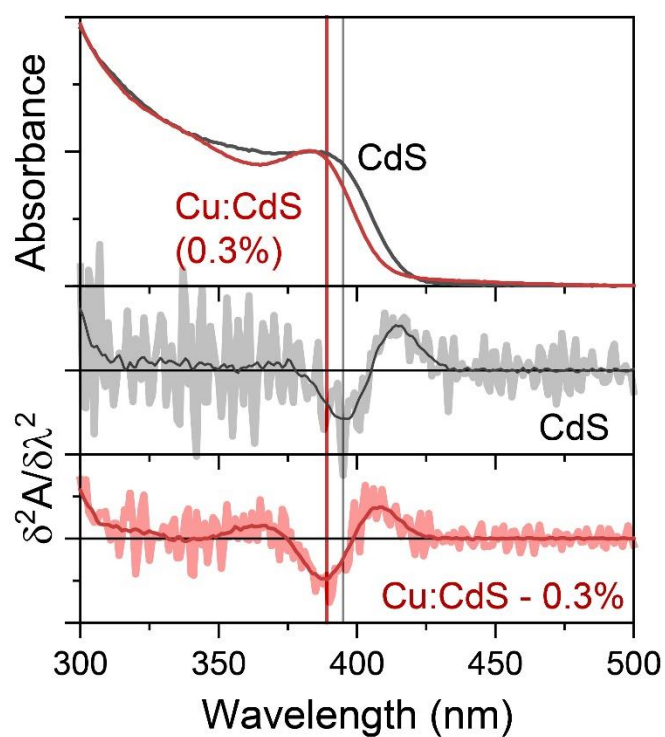

**Figure S2. Second Derivative of Absorption Spectrum.** (A) Absorption spectra of CdS QDs and Cu:CdS QDs (0.3%) and their corresponding second derivative spectra. The absorption onset is indicated with an arrow.

**Table ST2. QD size calculation.** Experimental QD size (TEM imaging) and calculated size (using Brus equation).

| Size         | CdS  | Cu:CdS (0.3%) |
|--------------|------|---------------|
| Calculated   | 3.98 | 3.71          |
| Experimental | 3.6  | 3.3           |

$$\Delta E(r) = E_{gap} + \frac{h^2}{8r^2} \left( \frac{1}{m_e^*} + \frac{1}{m_h^*} \right)$$

$E_{gap}$  = bulk band gap (2.41 eV for CdS);  $m_e^* = 0.2m_e$  and  $m_h^* = 0.8m_e$  for CdS

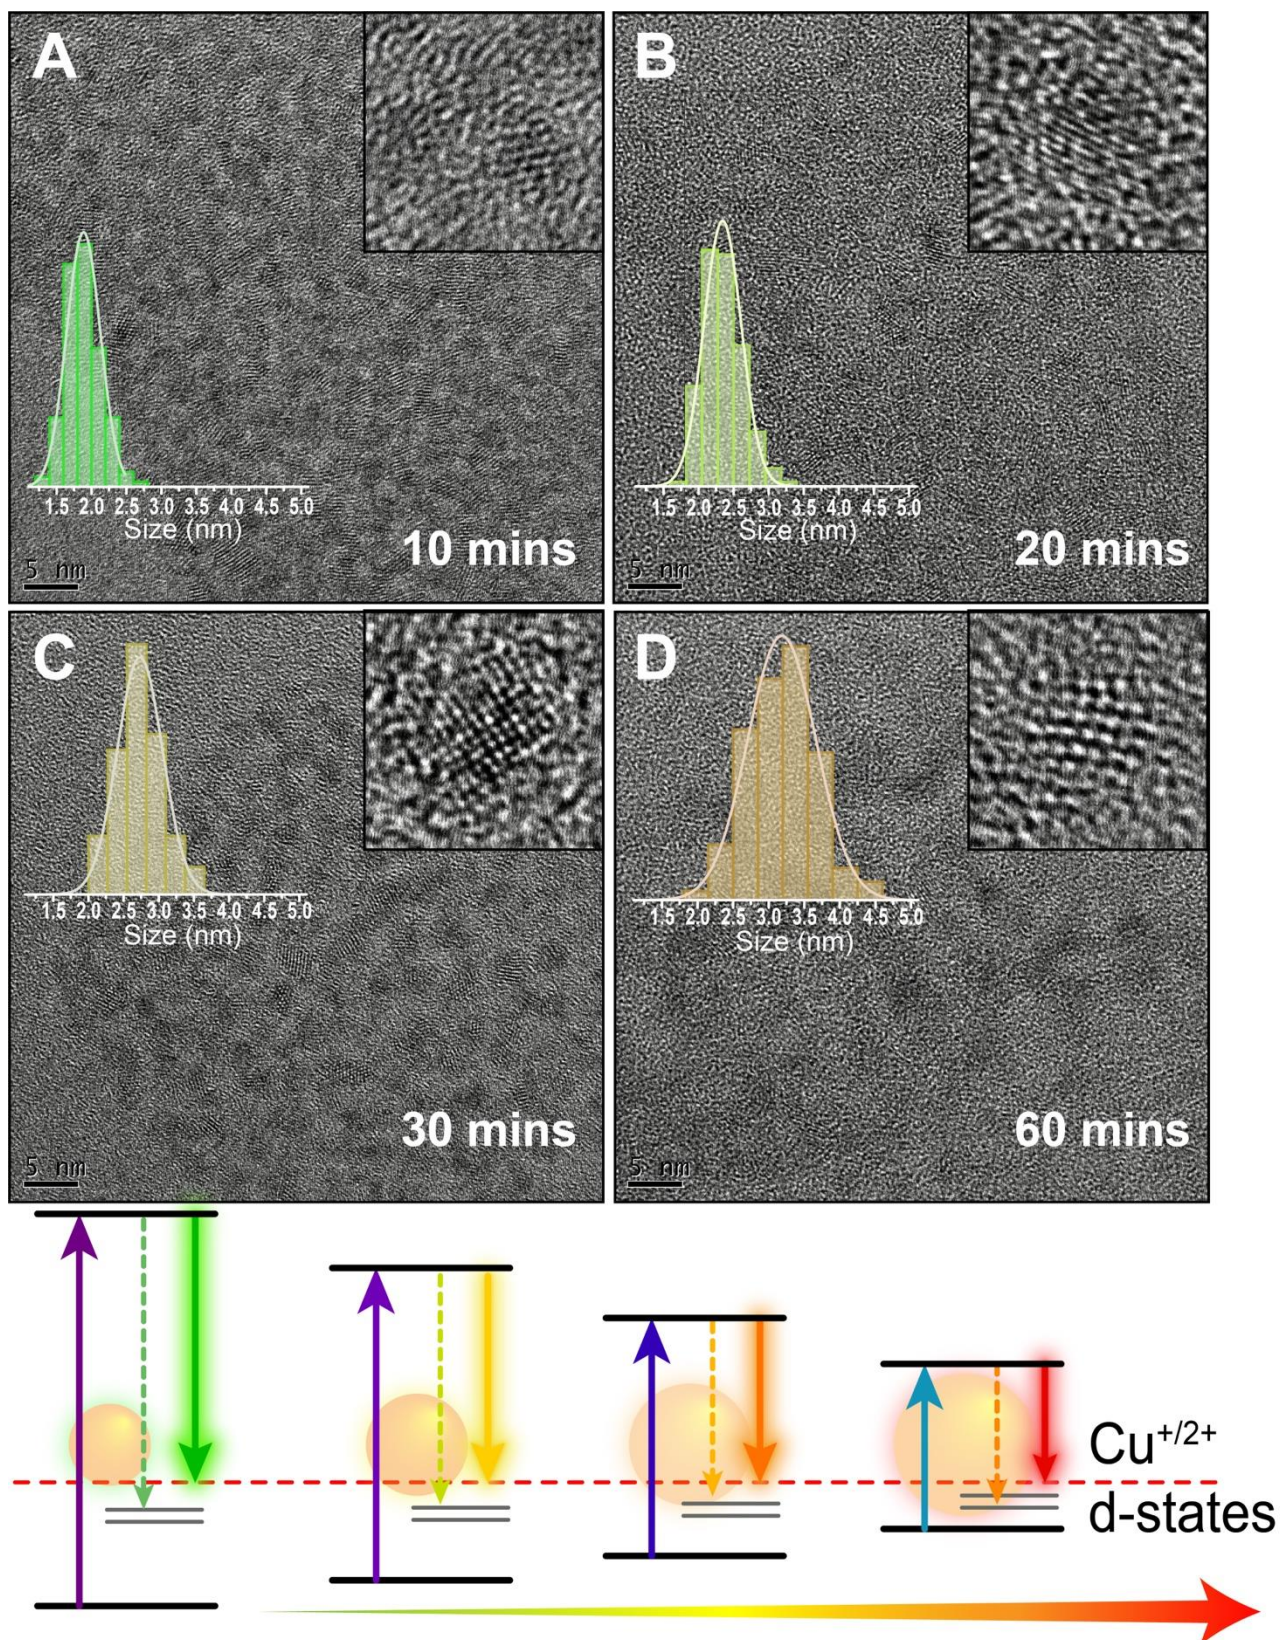

**Figure S3. QD size variation with reaction time.** TEM images of CdS quantum dot samples extracted at various reaction times and corresponding size distributions. Bottom panel depicts a schematic representation of the origin of color tunability in the samples due to variation of size and bandgap of QDs with increasing reaction time.

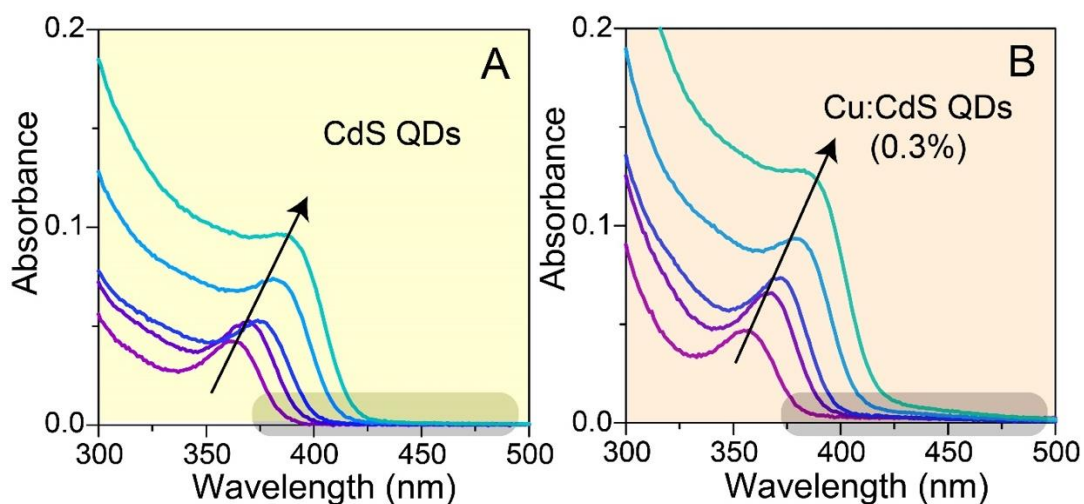

**Figure S4. Variation of UV-Vis absorption with reaction time.** Absorption spectra of sample aliquots taken with increasing reaction time for A) CdS QDs and B) 0.3% Cu:CdS QDs. The absorbance value increases as the reaction progresses indicating growth of the nanocrystals.

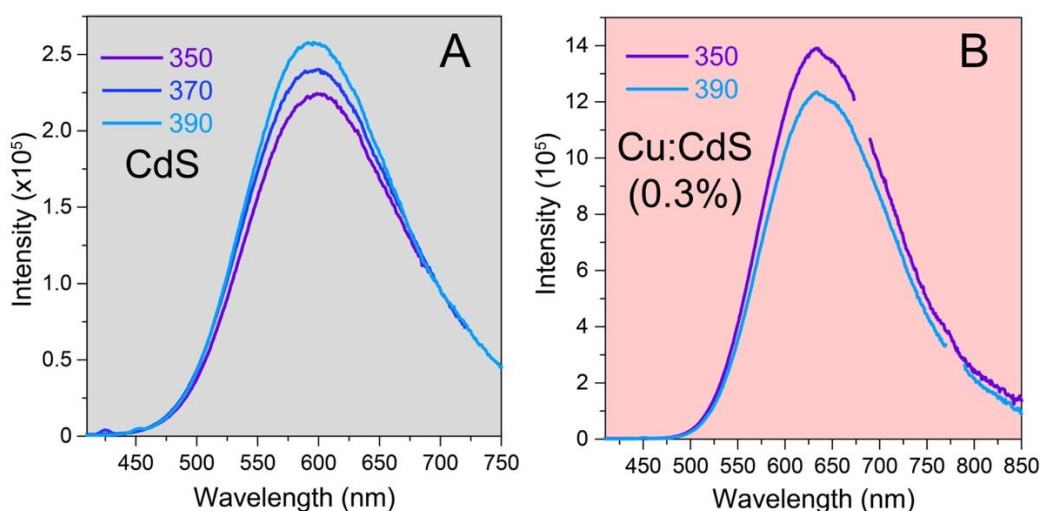

**Figure S5. Excitation wavelength dependent PL Spectra.** PL spectra of A) CdS QDs and B) 0.3% Cu:CdS QDs with varying excitation wavelength as indicated.

**Table ST3. Photoluminescence Quantum Yields.** Photoluminescence QY values of Cu:CdS QD samples after 60 min reaction time.

| Sample  | QY   |
|---------|------|
| CdS     | 0.05 |
| Cu-0.5% | 0.28 |
| Cu-1.0% | 0.32 |
| Cu-2.0% | 0.25 |

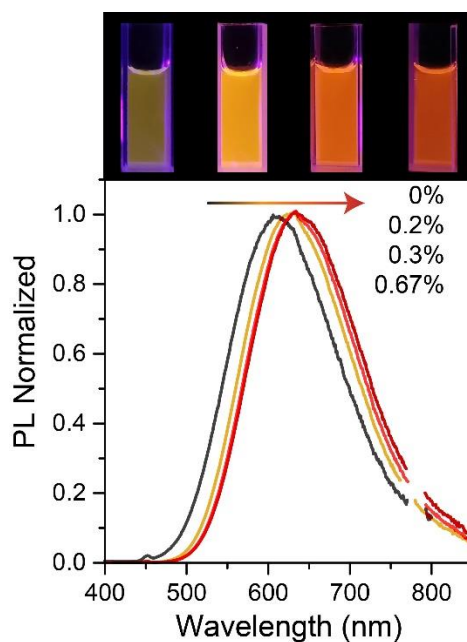

**Figure S6. Effect of doping level on PL spectra and color.** Variation of PL color and PL spectral change ( $\lambda_{ex} = 380$  nm) with increasing dopant concentration after 90 minutes reaction. While there is no significant shift in PL maxima as Cu% increases from 0.2% to 0.67%, however the spectra broadens towards the red-wavelength region.

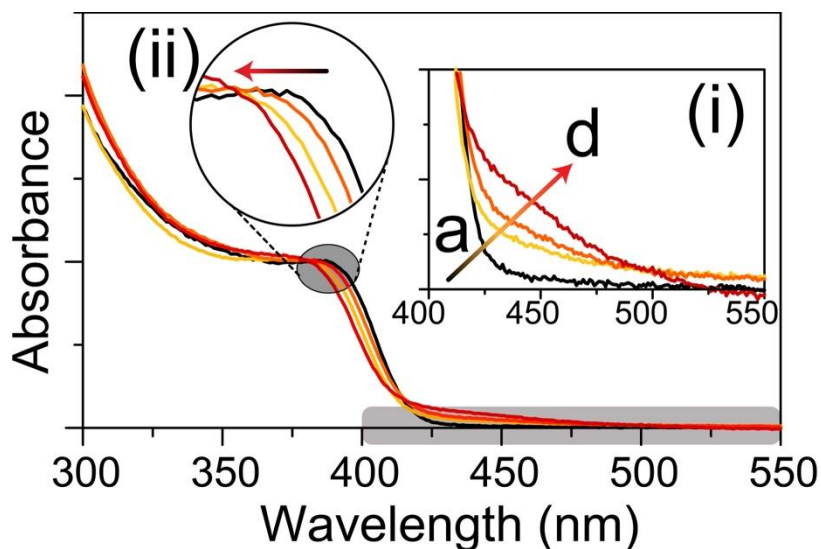

**Figure S7. MLC<sub>CB</sub>T band in UV-Vis absorbance.** Normalized absorption spectra a) CdS QDs and Cu-doped QDs with %Cu c) 0.2%, d) 0.3%, and d) 0.67%. *Inset of D:* (i) Magnified view of the tail end of the absorption spectra showing the MLC<sub>CB</sub>CT transition. (ii) Magnified view showing the gradual blue shift of absorption peak with increase in dopant concentration.



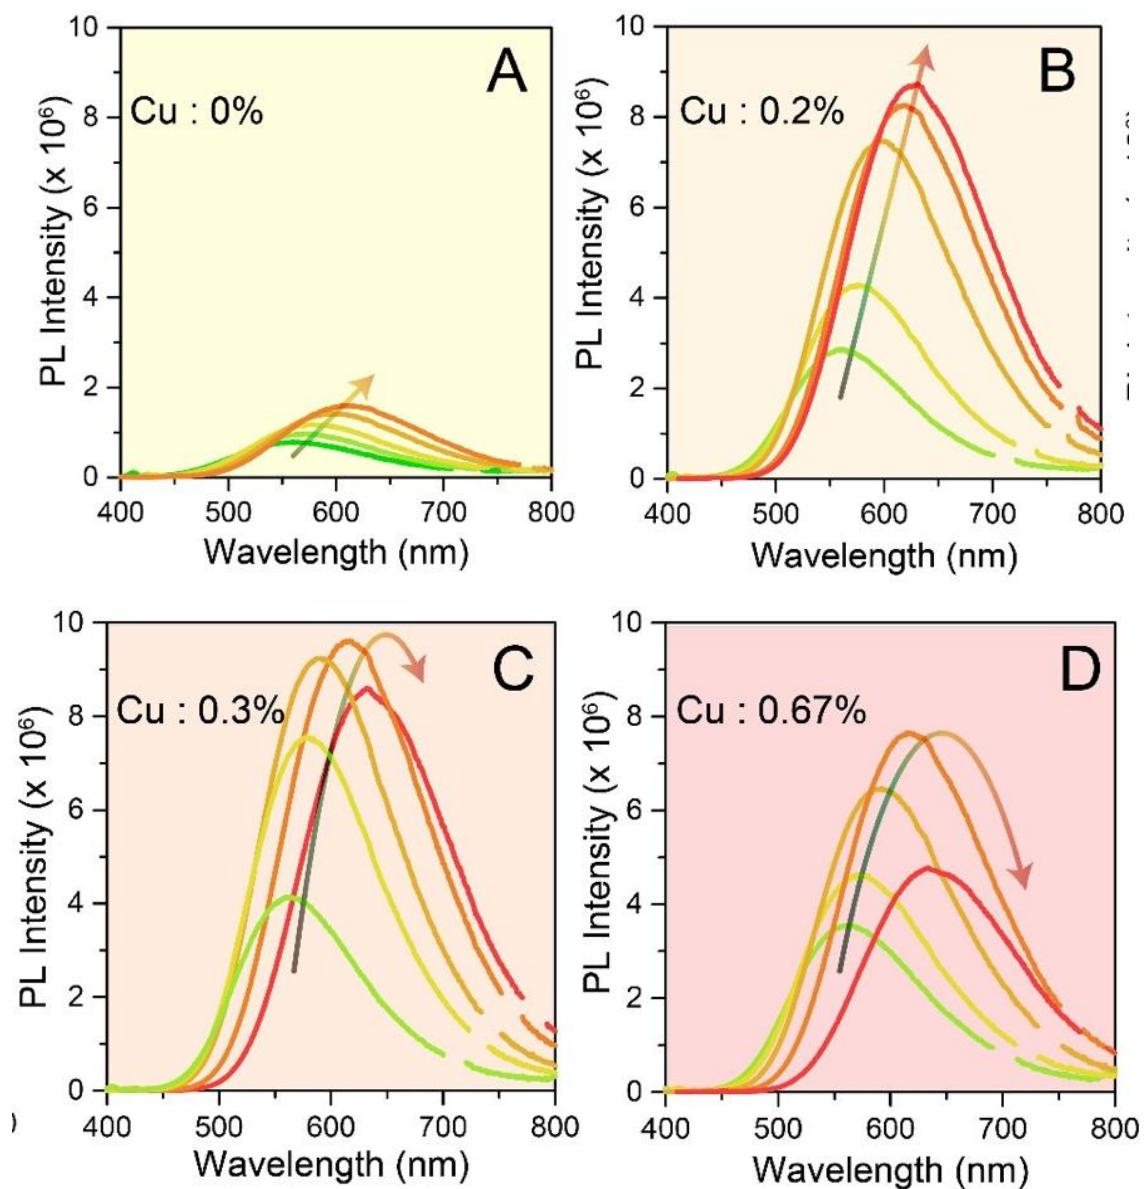

**Figure S8.** Variation of PLQY with increasing reaction time for a) CdS QDs and Cu-doped CdS QDs with Cu: Cd concentration of (B) 0.2%, (C) 0.3% and (D) 0.67%.

**Table ST4.** Temporal parameters for PL of undoped and Cu-doped CdS QDs

| Sample       | $a_1$<br>( $\tau_1 = 1.2$ ns) | $a_2$<br>( $\tau_2 = 16$ ns) | $a_3$<br>( $\tau_3 = 94$ ns) | $a_4$<br>( $\tau_4 = 530$ ns) |
|--------------|-------------------------------|------------------------------|------------------------------|-------------------------------|
| CdS          | 0.76                          | 0.11                         | 0.13                         | -                             |
| 0.2% Cu:CdS  | 0.41                          | 0.11                         | 0.07                         | 0.41                          |
| 0.3% Cu:Cds  | 0.32                          | 0.11                         | 0.05                         | 0.52                          |
| 0.67% Cu:CdS | 0.29                          | 0.11                         | 0.04                         | 0.56                          |

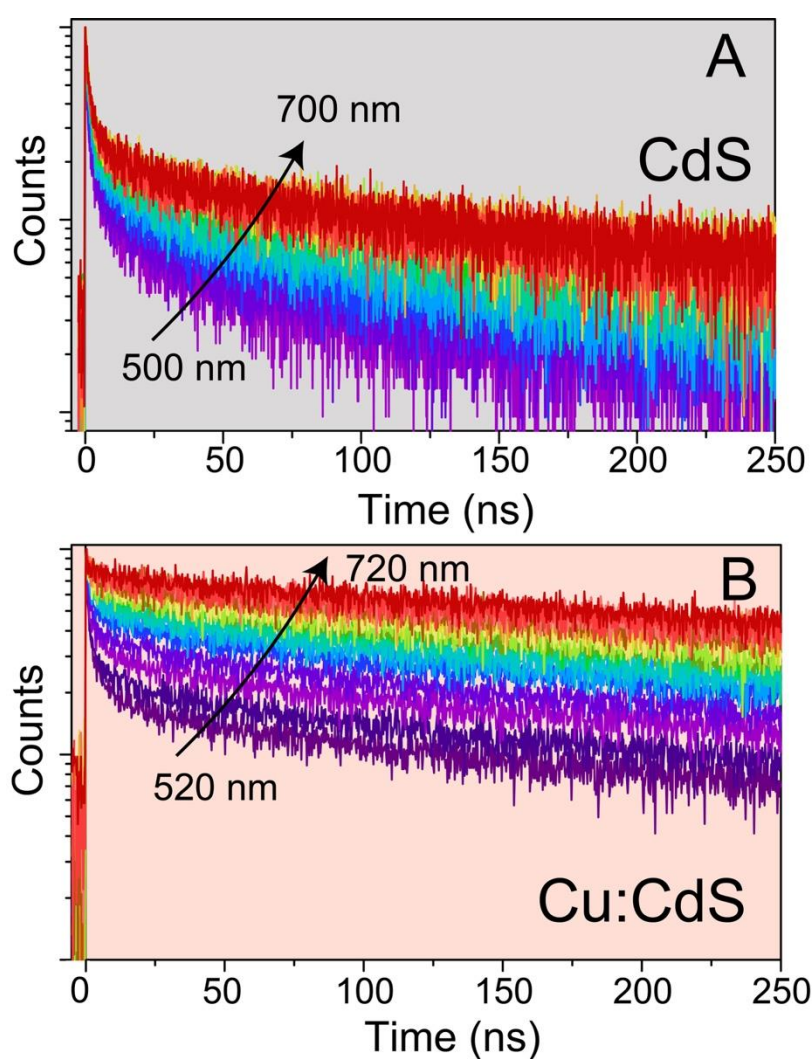

**Figure S9. Wavelength dependent nanosecond PL transients.** Wavelength dependent PL transients of (A) undoped CdS QDs and (B) 0.3% Cu:CdS QDs ( $\lambda_{ex} = 380$  nm).

**Table ST5. FCS parameters for undoped and Cu:CdS QDs.** Parameters off-state fraction (T), Blinking Time ( $\tau_T$ ), stretching exponent ( $\beta$ ), number of molecules N and counts per molecule (cpm) as obtained from fitting of PL correlation curves of recorded with 3  $\mu$ W excitation power.

| Sample   | T                | $\tau_T$ ( $\mu$ s) | $\beta$          | Counts per molecule | $\langle N \rangle$ |
|----------|------------------|---------------------|------------------|---------------------|---------------------|
| CdS      | $0.67 \pm 0.057$ | $120 \pm 11$        | $0.57 \pm 0.07$  | $425 \pm 49$        | $7.55 \pm 0.82$     |
| Cu-0.2%  | $0.36 \pm 0.008$ | $103 \pm 11$        | $0.75 \pm 0.079$ | $911 \pm 89$        | $11.4 \pm 1.1$      |
| Cu-0.3%  | $0.29 \pm 0.012$ | $87 \pm 9$          | $0.87 \pm 0.073$ | $1422 \pm 149$      | $14.5 \pm 0.99$     |
| Cu-0.67% | $0.5 \pm 0.03$   | $115 \pm 10$        | $0.69 \pm 0.054$ | $838 \pm 92$        | $10.2 \pm 1.2$      |

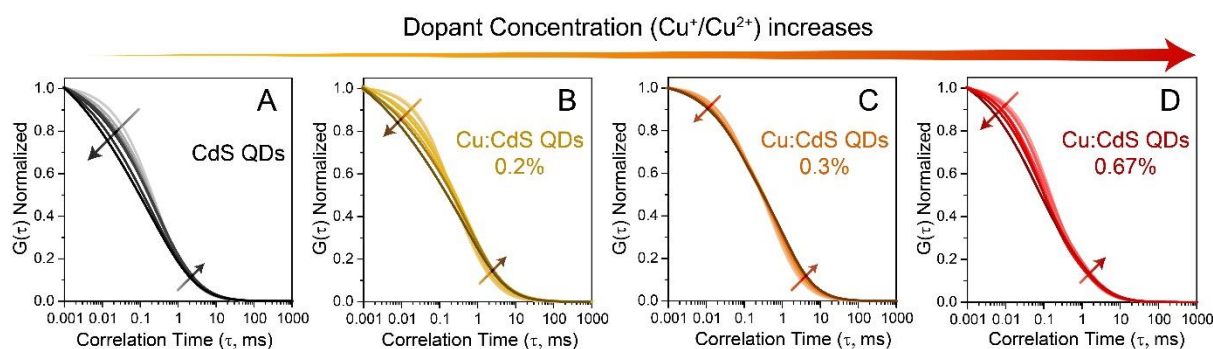

**Figure S10. Power dependence of FCS curves.** Normalized fluorescence correlation fitting curves at various excitation power depicting the change in line shape of the correlation curves with increasing excitation power for A) CdS QDs, and Cu:CdS QDs with Cu% (B) 0.2%, (C) 0.3% and (D) 0.67%.

**Table ST6. Variation of FCS fitting parameters with increasing excitation power.** Parameters off-state fraction (T), Blinking Time ( $\tau_T$ ) and stretching exponent ( $\beta$ ) as obtained from fitting of PL correlation curves recorded at various excitation powers.

| Exc. Power ( $\mu\text{W}$ ) | T                | $\tau_T$ ( $\mu\text{s}$ ) | $\beta$          |
|------------------------------|------------------|----------------------------|------------------|
| <b>CdS QDs</b>               |                  |                            |                  |
| 2.9                          | $0.67 \pm 0.057$ | $120 \pm 11$               | $0.57 \pm 0.07$  |
| 5.8                          | $0.68 \pm 0.07$  | $86 \pm 8$                 | $0.53 \pm 0.065$ |
| 10.2                         | $0.71 \pm 0.068$ | $68 \pm 5$                 | $0.48 \pm 0.052$ |
| 14.5                         | $0.73 \pm 0.09$  | $61 \pm 7$                 | $0.46 \pm 0.058$ |
| 18.8                         | $0.74 \pm 0.008$ | $54 \pm 6$                 | $0.39 \pm 0.048$ |
| 23.2                         | $0.75 \pm 0.11$  | $50 \pm 4$                 | $0.29 \pm 0.036$ |
| 29                           | $0.76 \pm 0.04$  | $47 \pm 5$                 | $0.25 \pm 0.028$ |
| <b>Cu:CdS QDs (0.2%)</b>     |                  |                            |                  |
| 2.9                          | $0.36 \pm 0.008$ | $103 \pm 11$               | $0.75 \pm 0.079$ |
| 5.8                          | $0.39 \pm 0.04$  | $89 \pm 10$                | $0.65 \pm 0.052$ |
| 10.2                         | $0.52 \pm 0.06$  | $79 \pm 9$                 | $0.48 \pm 0.041$ |
| 14.5                         | $0.70 \pm 0.065$ | $68 \pm 6$                 | $0.38 \pm 0.035$ |
| 18.8                         | $0.74 \pm 0.08$  | $59 \pm 4$                 | $0.42 \pm 0.031$ |
| 23.2                         | $0.76 \pm 0.12$  | $47 \pm 5$                 | $0.34 \pm 0.033$ |
| 29                           | $0.79 \pm 0.09$  | $41 \pm 4$                 | $0.32 \pm 0.031$ |

| Exc. Power ( $\mu\text{W}$ ) | T                | $\tau_T$ ( $\mu\text{s}$ ) | $\beta$          |
|------------------------------|------------------|----------------------------|------------------|
| <b>Cu:CdS QDs (0.3%)</b>     |                  |                            |                  |
| 2.9                          | $0.29 \pm 0.012$ | $87 \pm 9$                 | $0.87 \pm 0.073$ |
| 5.8                          | $0.35 \pm 0.009$ | $81 \pm 10$                | $0.77 \pm 0.068$ |
| 10.2                         | $0.39 \pm 0.03$  | $75 \pm 6$                 | $0.69 \pm 0.048$ |
| 14.5                         | $0.40 \pm 0.05$  | $68 \pm 8$                 | $0.65 \pm 0.057$ |
| 18.8                         | $0.41 \pm 0.061$ | $62 \pm 6$                 | $0.61 \pm 0.037$ |
| 23.2                         | $0.43 \pm 0.04$  | $59 \pm 5$                 | $0.57 \pm 0.022$ |
| 29                           | $0.46 \pm 0.057$ | $51 \pm 4$                 | $0.50 \pm 0.031$ |
| <b>Cu:CdS QDs (0.67%)</b>    |                  |                            |                  |
| 2.9                          | $0.5 \pm 0.03$   | $115 \pm 10$               | $0.69 \pm 0.054$ |
| 5.8                          | $0.52 \pm 0.025$ | $103 \pm 12$               | $0.65 \pm 0.061$ |
| 10.2                         | $0.57 \pm 0.06$  | $89 \pm 7$                 | $0.62 \pm 0.058$ |
| 14.5                         | $0.61 \pm 0.073$ | $73 \pm 8$                 | $0.61 \pm 0.042$ |
| 18.8                         | $0.64 \pm 0.08$  | $67 \pm 8$                 | $0.57 \pm 0.035$ |
| 23.2                         | $0.67 \pm 0.055$ | $57 \pm 5$                 | $0.49 \pm 0.043$ |
| 29                           | $0.69 \pm 0.091$ | $42 \pm 4$                 | $0.41 \pm 0.031$ |

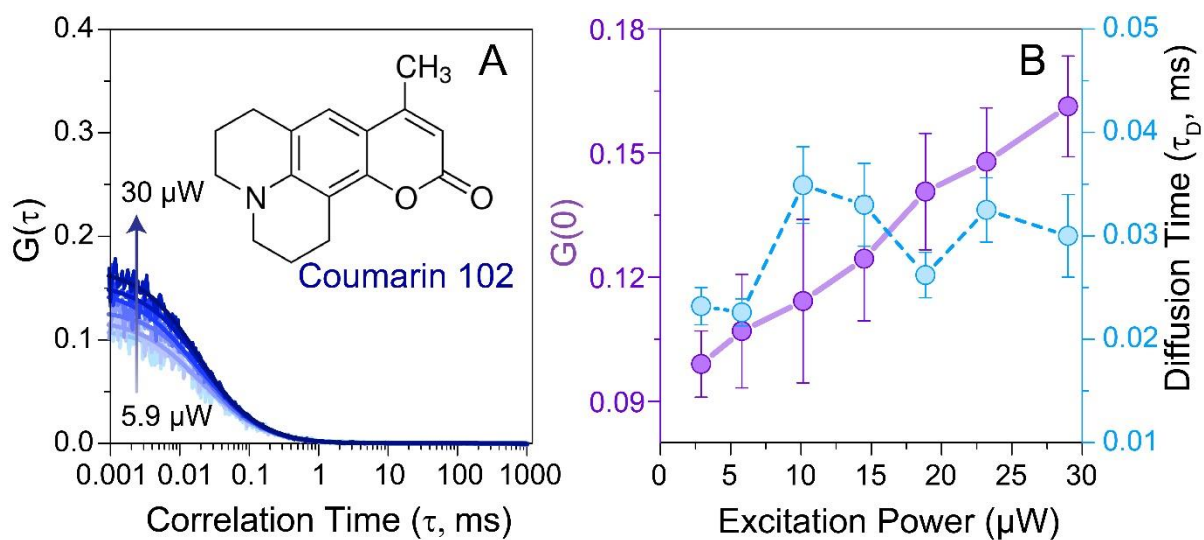

**Figure S11. FCS control experiment with dye C102.** (A) Fluorescence correlation curves of C102 in water with increasing excitation power. (B) Variation of initial correlation amplitude  $G(0)$  and diffusion time ( $\tau_D$ ) as a function of excitation power. Slight increase in initial correlation amplitude with increasing excitation power arises from photobleaching effect.

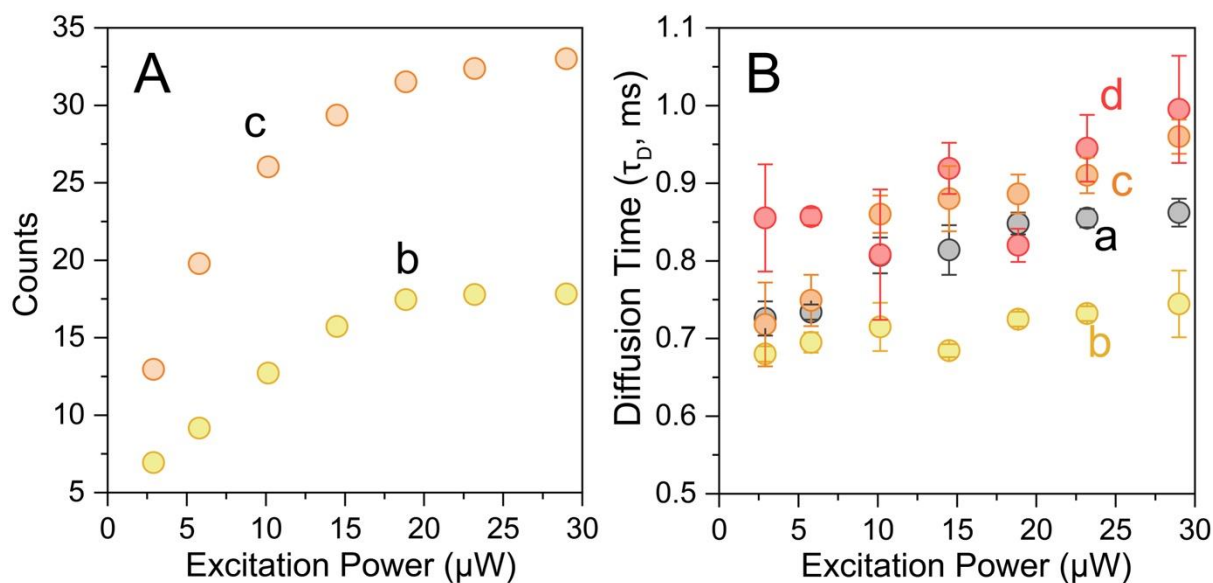

**Figure S12.** Variation of (A) PL intensity and (B) Diffusion time  $\tau_D$  with increasing excitation power for a) CdS QDs and Cu:CdS QDs with Cu% as b) 0.2%, b) 0.3% and d) 0.67%.
